# Supplementary material
Source: Springer Nature journal article supplement (https://www.springermedizin.de/resource/supplementary/13000_2010_339_MOESM1_ESM.pdf/9624310)

carcinoma papillare gl. thyroideae, 100X

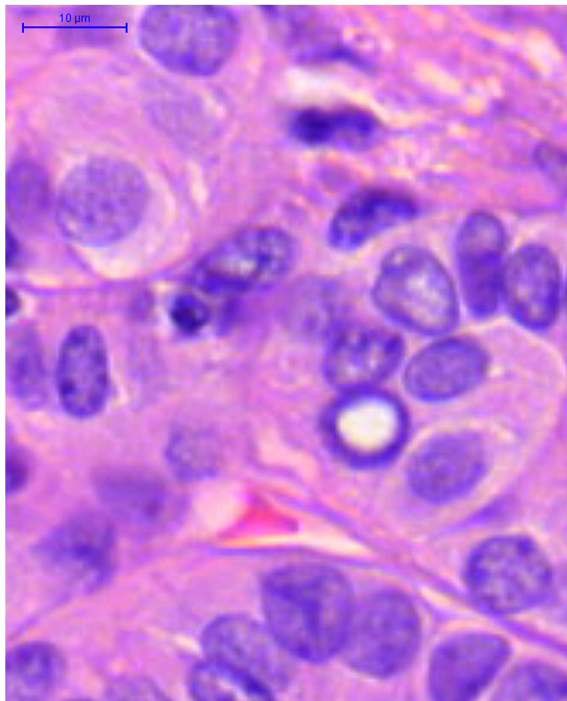

JPEG Quality Factor 90

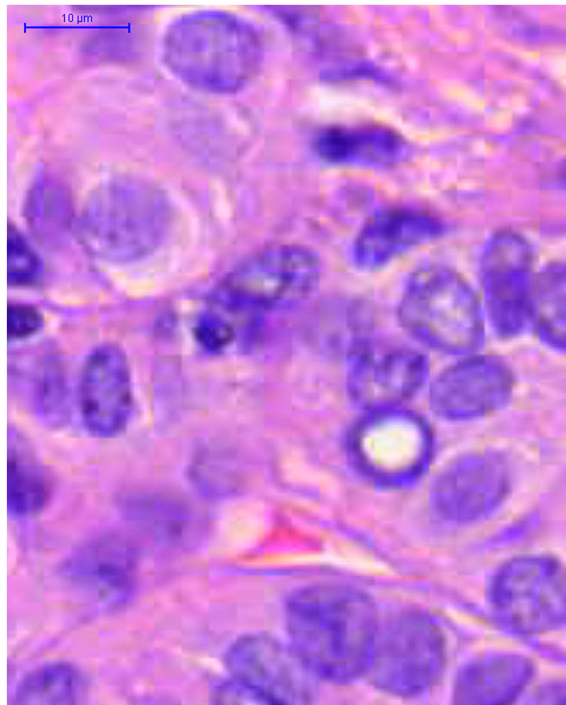

JPEG Quality Factor 40

Supplement: MOESM1 [file 9624310]
